# Supplementary material for: An Overview of the Western United States Dynamically Downscaled Dataset (WUS-D3)
Source: Copernicus journal article supplement (doi:10.5194/gmd-2023-162), 2023-10-19
Supplement: Supplementary file 1 [file gmd-2023-162-supplement.pdf]

# Supplement for “An Overview of the Western United States Dynamically Downscaled Dataset (WUS-D3)”

<sup>1</sup>Stefan Rahimi, <sup>1</sup>Lei Huang, <sup>1</sup>Jesse Norris, <sup>1</sup>Alex Hall, <sup>1</sup>Naomi Goldenson, <sup>1</sup>Will Krantz, <sup>1</sup>Ben Bass, <sup>1</sup>Chad Thackeray, <sup>1</sup>Henry Lin, <sup>1</sup>Di Chen, <sup>1</sup>Eli Dennis, <sup>2</sup>Ethan Collins, <sup>3</sup>Zach Lebo, and <sup>1</sup>Emily Slinsky

<sup>1</sup>Center for Climate Science, University of California Los Angeles, Los Angeles, California, 90095, U.S.A.

<sup>2</sup>Department of Atmospheric Science, University of Wyoming, Laramie, Wyoming, 82071, U.S.A.

<sup>3</sup>School of Meteorology, University of Oklahoma, Norman, Oklahoma 73019, U.S.A.

Correspondence to: Stefan Rahimi ([s.rahimi@ucla.edu](mailto:s.rahimi@ucla.edu))

## 1980-2009 SSTs

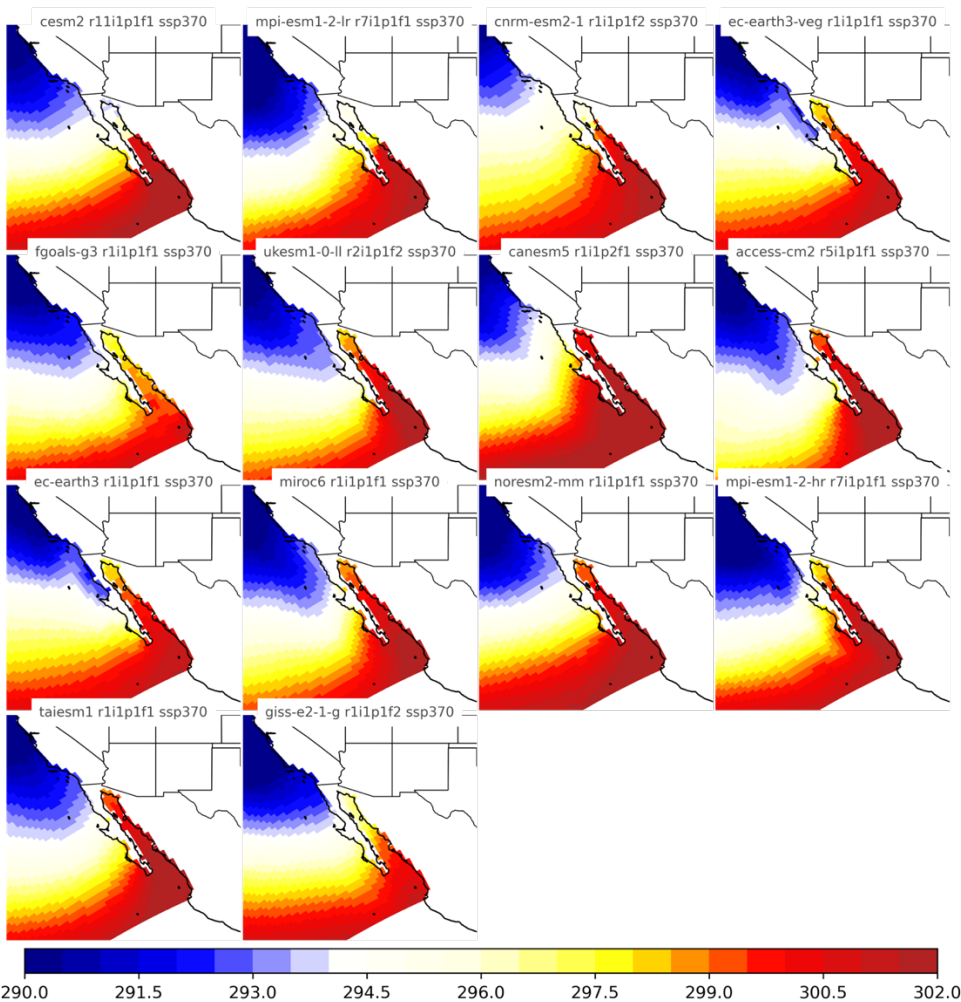

Figure S1. Annual-mean sea surface temperatures (SSTs; [K]) from 1980-2009 from 14 GCMs considered in this study

# DJF surface air temperature bias

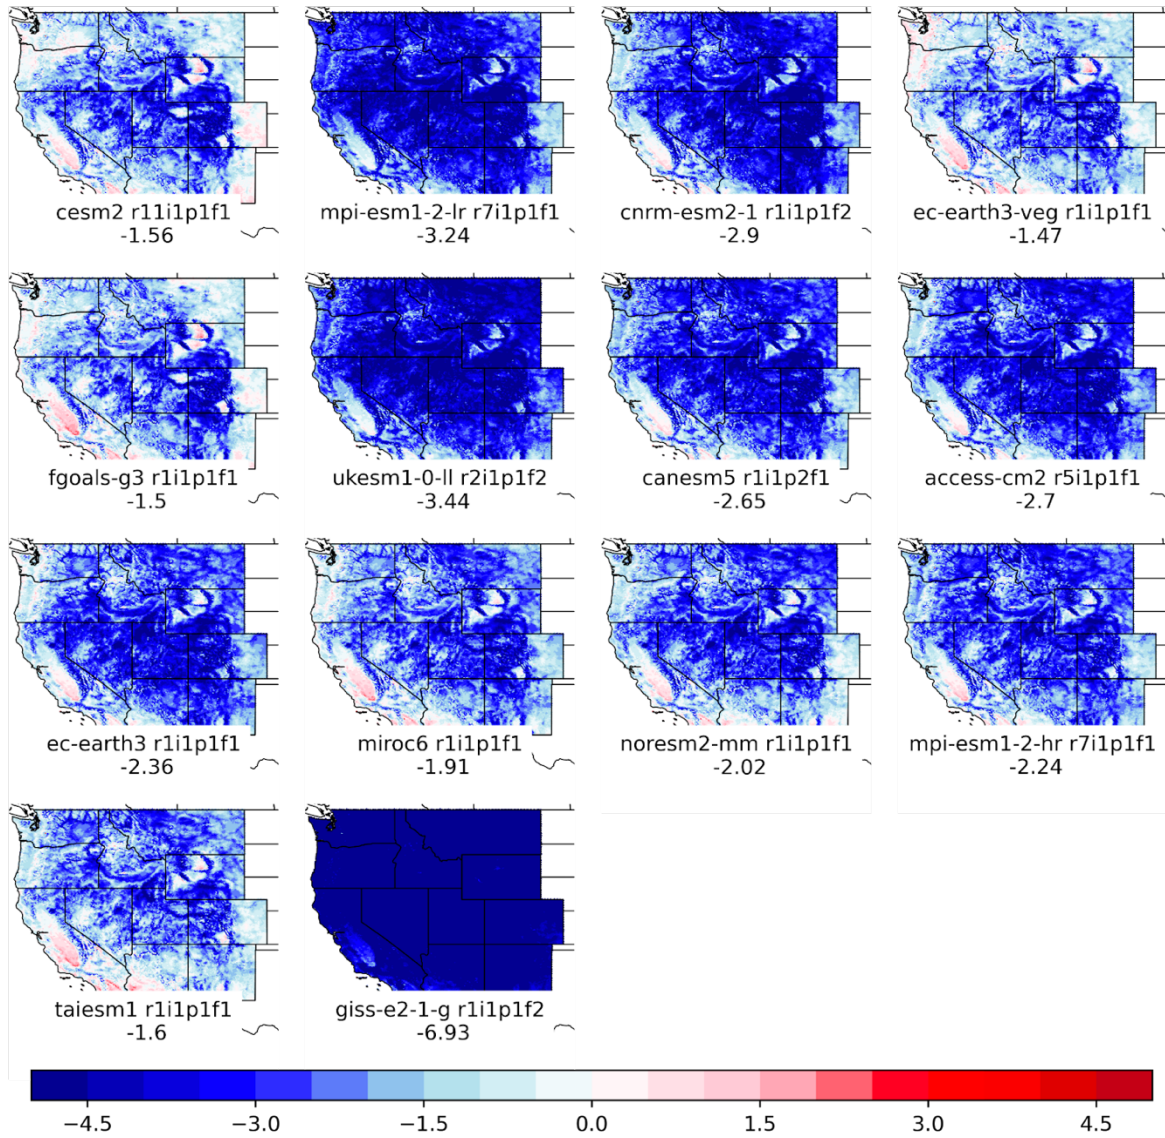

Figure S2. Wintertime (DJF) biases in dynamically downscaled surface air temperature from 1981-2010 relative to PRISM. 11-state-mean biases are presented beneath each GCM label [K].

# DJF precipitation bias

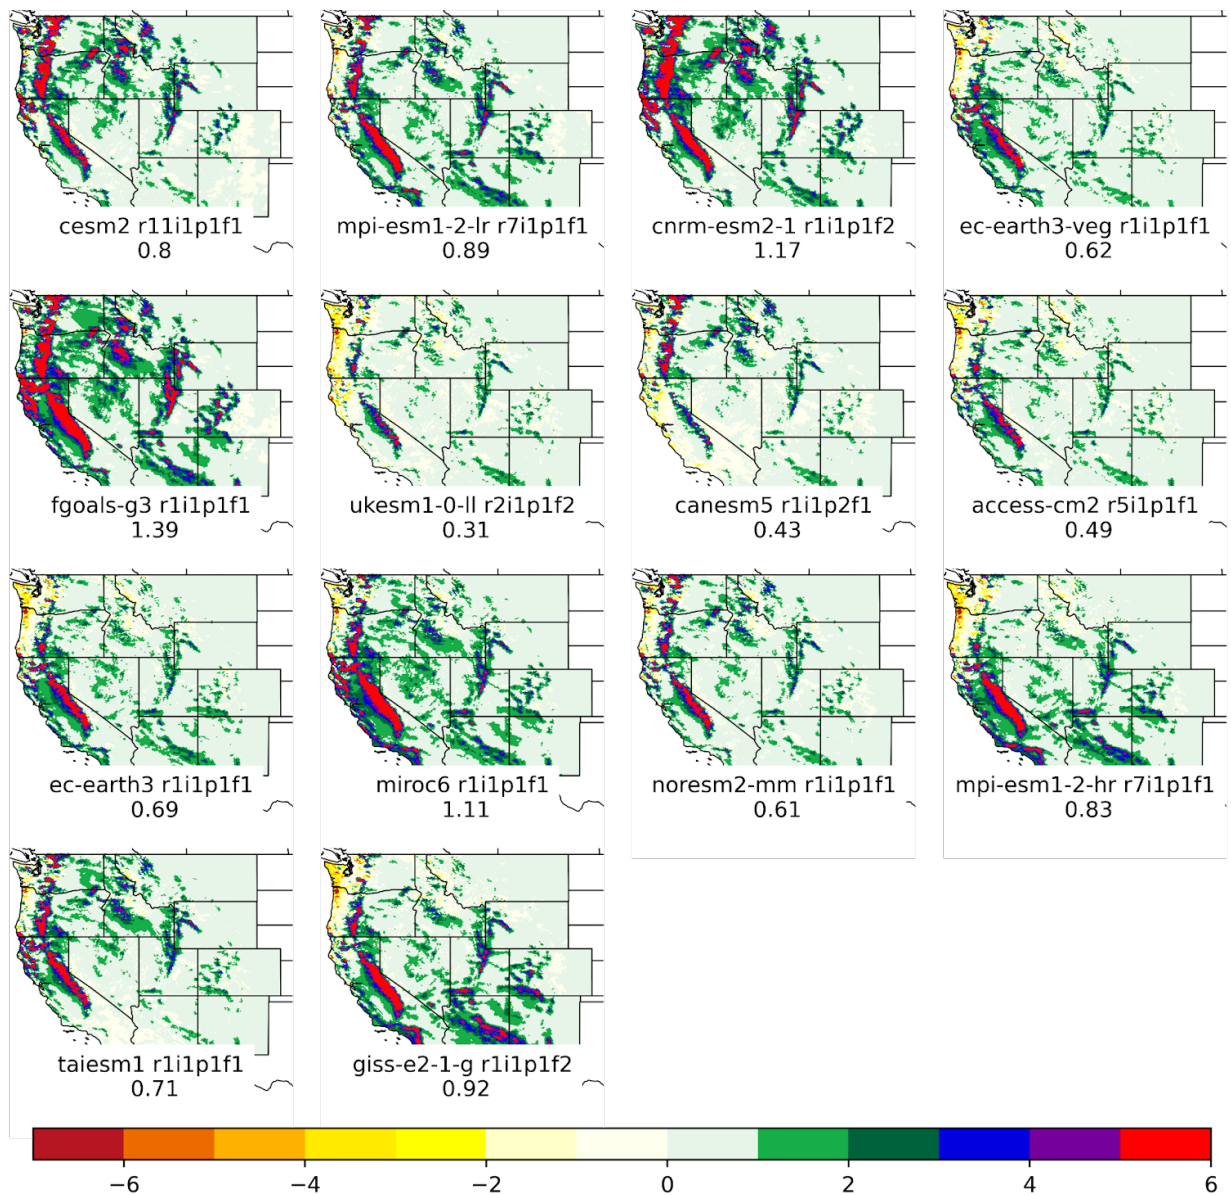

Figure S3. Same as in Fig. S2, but for precipitation rate [mm d<sup>-1</sup>].

### Climate response signals from GCM ensemble

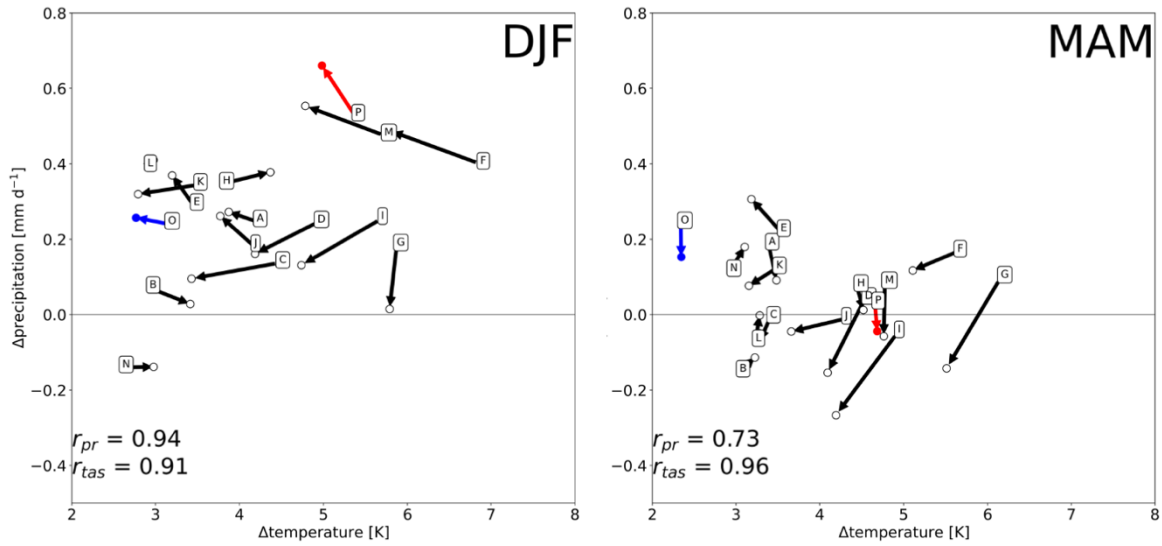

**Figure S4.** Future winter (DJF) and springtime (MAM) climate response for parent GCMs (indicated by lettering) and their downscaled counterparts (indicated by circles) on the 9-km WRF grid averaged across 11 western U.S. states (End-Century). Non-colored circles are for SSP3-7.0 projections only, while blue (red) circles represent the SSP2-4.5 (SSP5-8.5) projections. Arrows point away from parent GCMs towards downscaled counterparts.

## Temperature change by EC

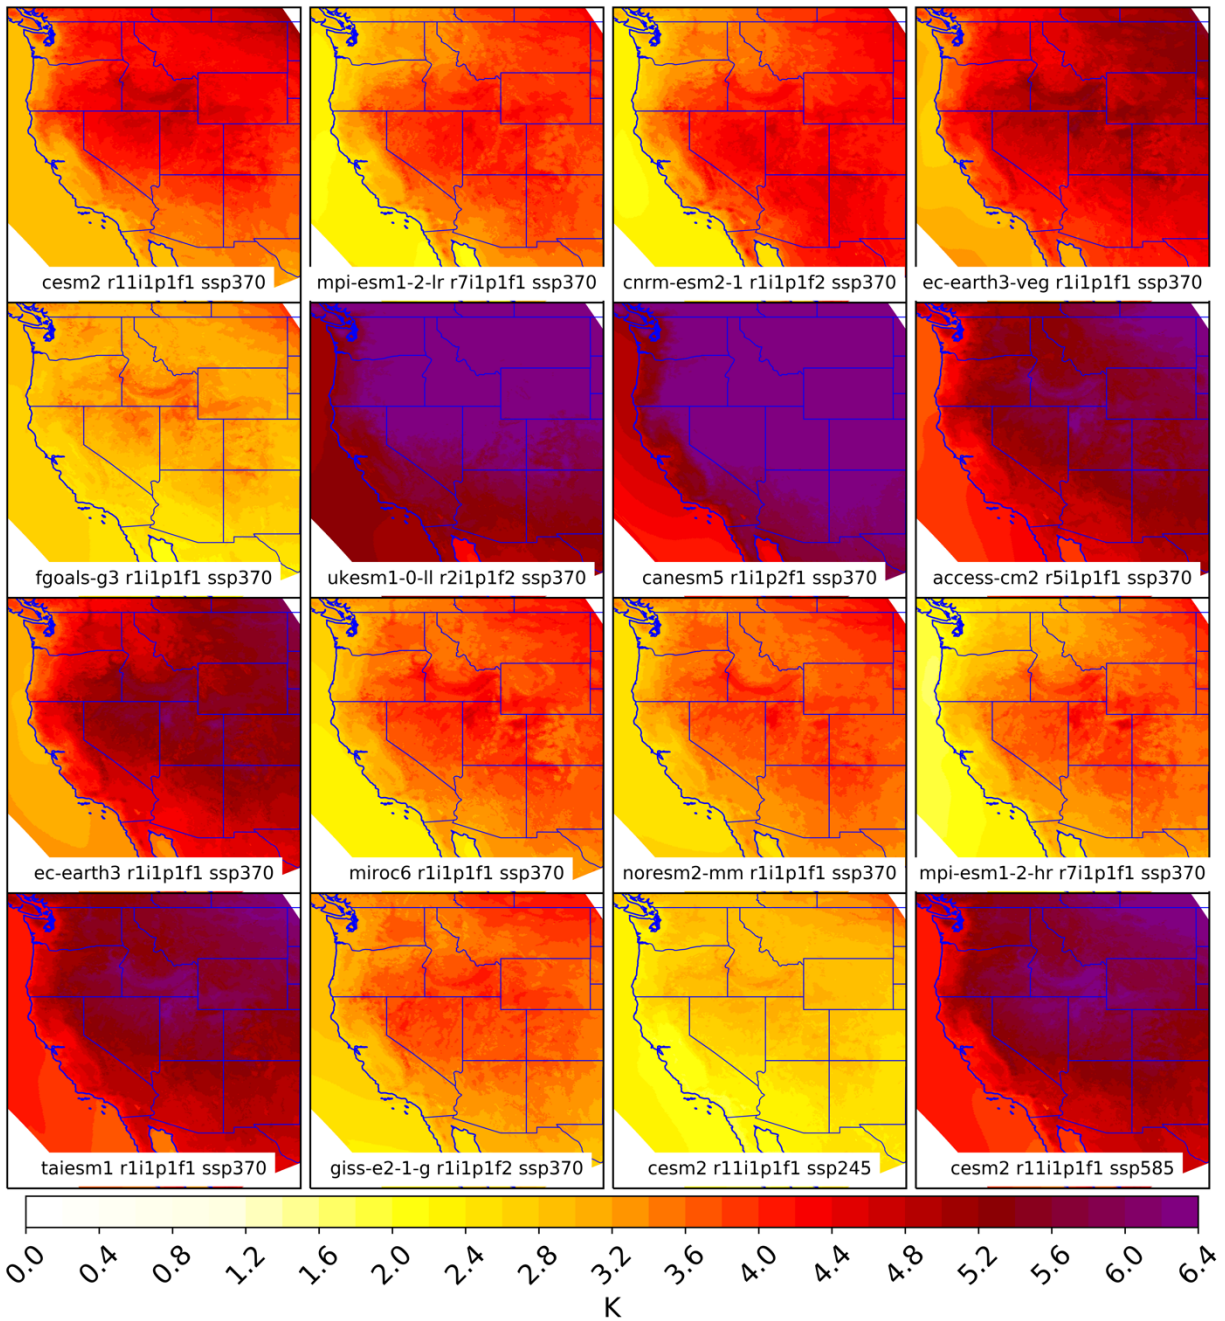

Figure S5. Changes in annual-mean surface air temperature by the end-of-century (2070-2100) period.

# Precipitation change by EC

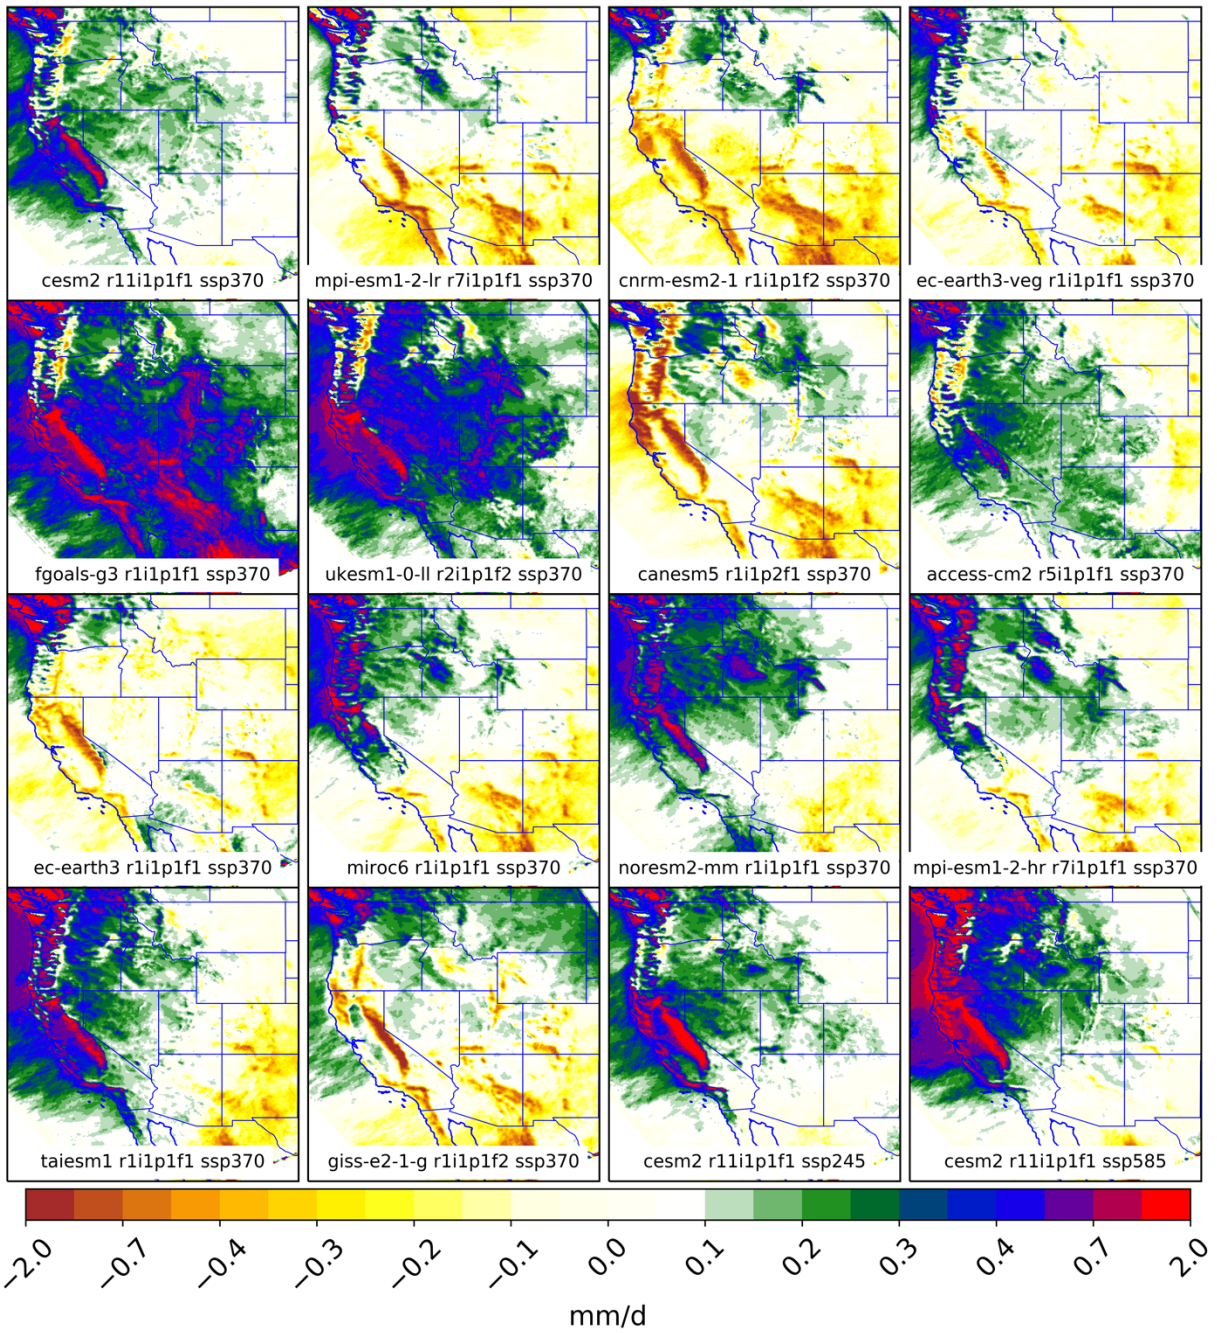

Figure S6. Same as in Fig. S5, but for precipitation [ $\text{mm d}^{-1}$ ].

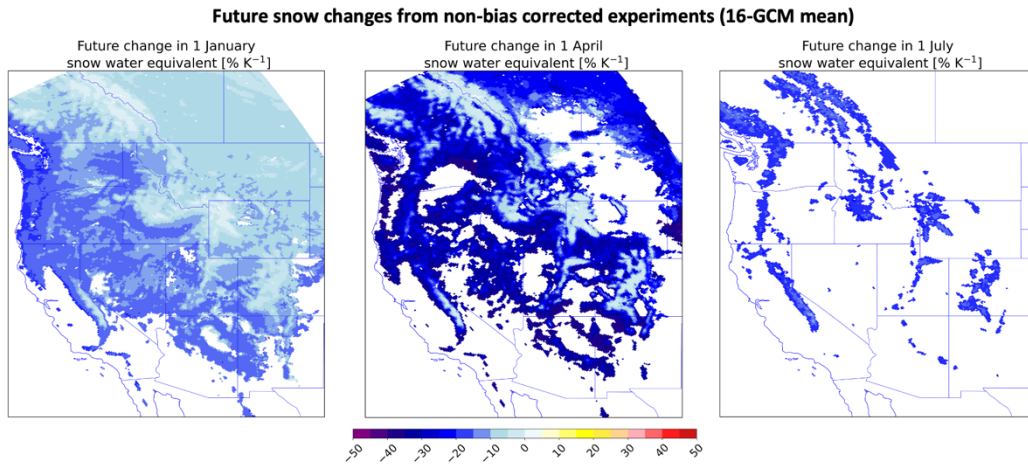

**Figure S7.** Future changes in 1 April snow water equivalent normalized by the amount of global warming [% K<sup>-1</sup>] in the 16-GCM mean.

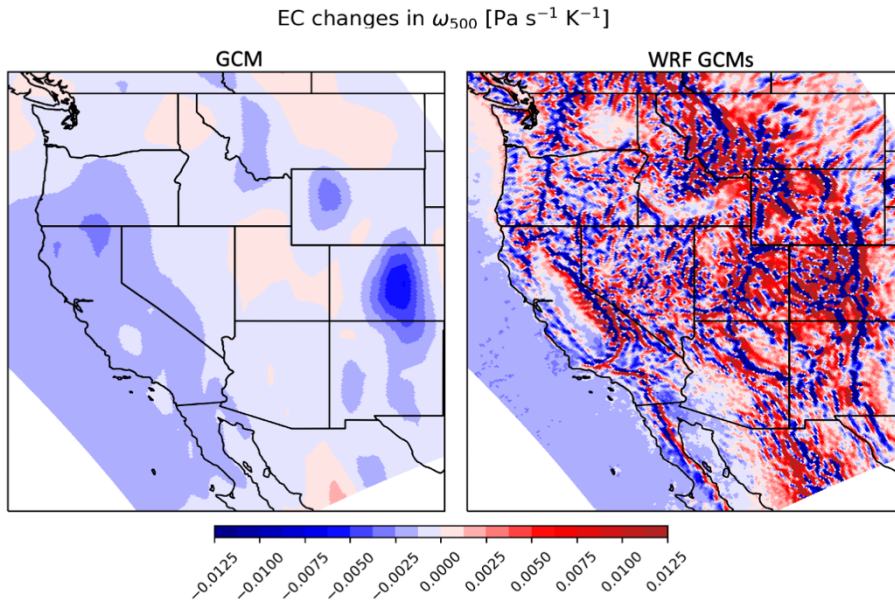

**Figure S8.** Ensemble-mean future changes in 500 hPa pressure velocity normalized by end-of-century (2070-2100) mean global warming [Pa s<sup>-1</sup> K<sup>-1</sup>].

## Fractional precipitation change from GCMs

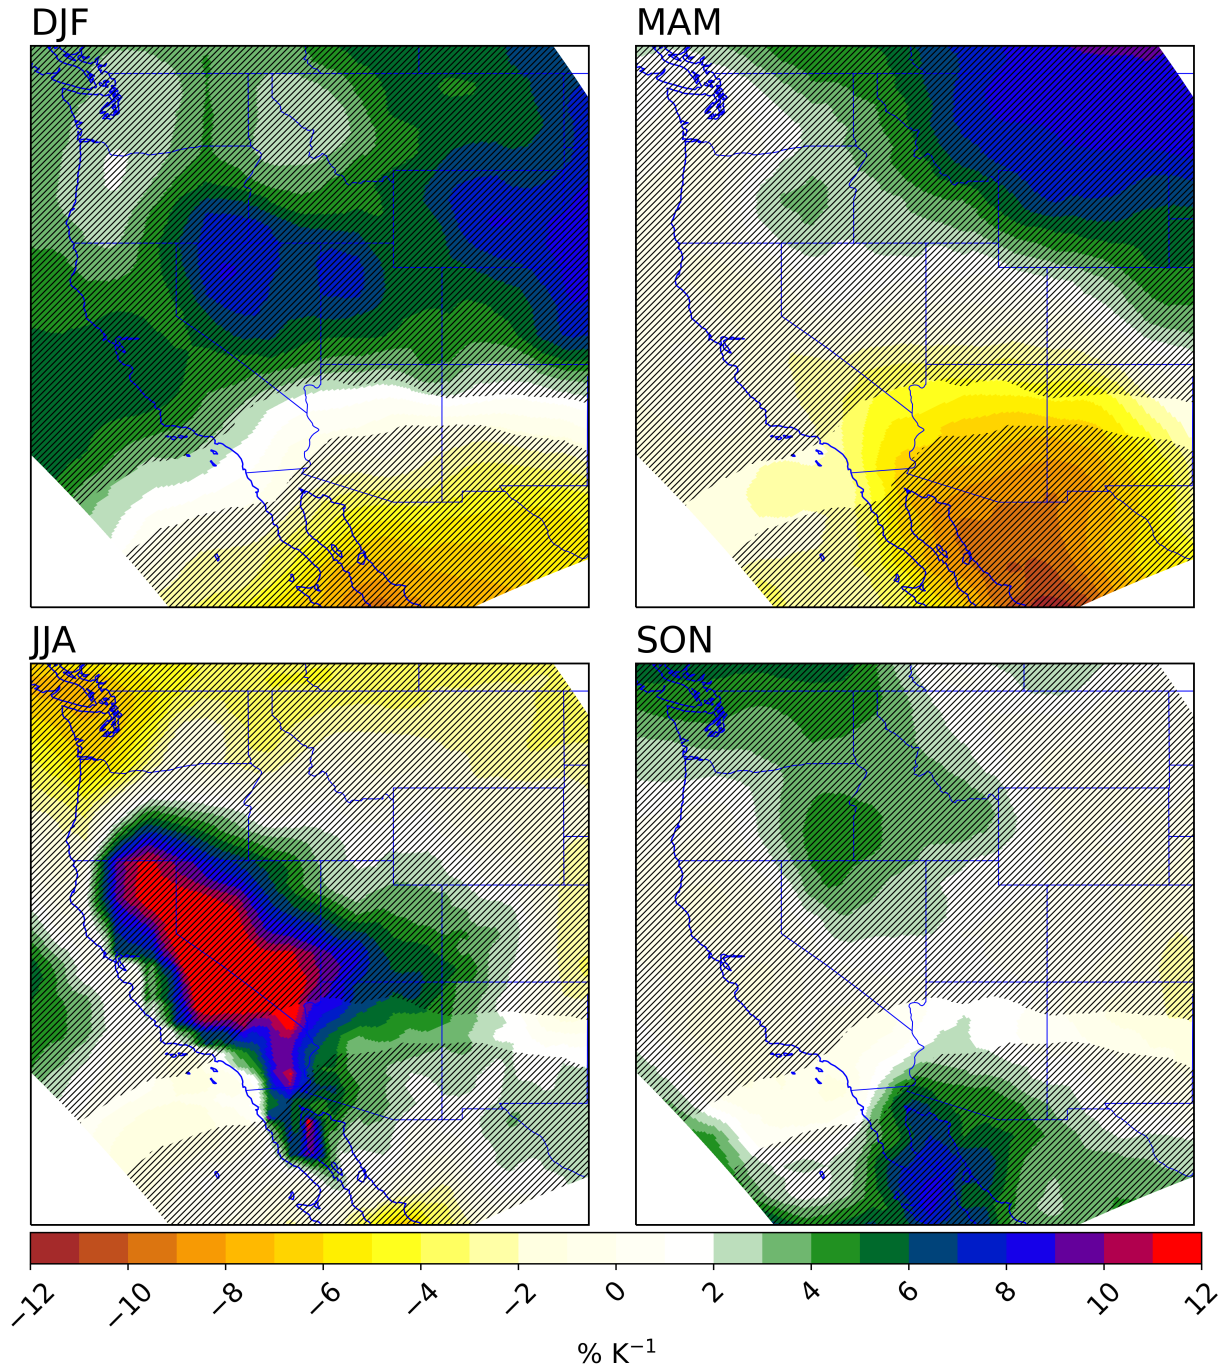

Figure S9. 16-GCM-mean future changes in native-GCM fractional precipitation normalized by the amount of global warming [ $\% K^{-1}$ ]. Hatching indicates statistical significance to the 95% confidence interval when grid point distributions are subjected to a two-sided Student's t-test. Stippling is not included for temperature because every grid point returns a p value smaller than 0.05.



### rx1 change by EC

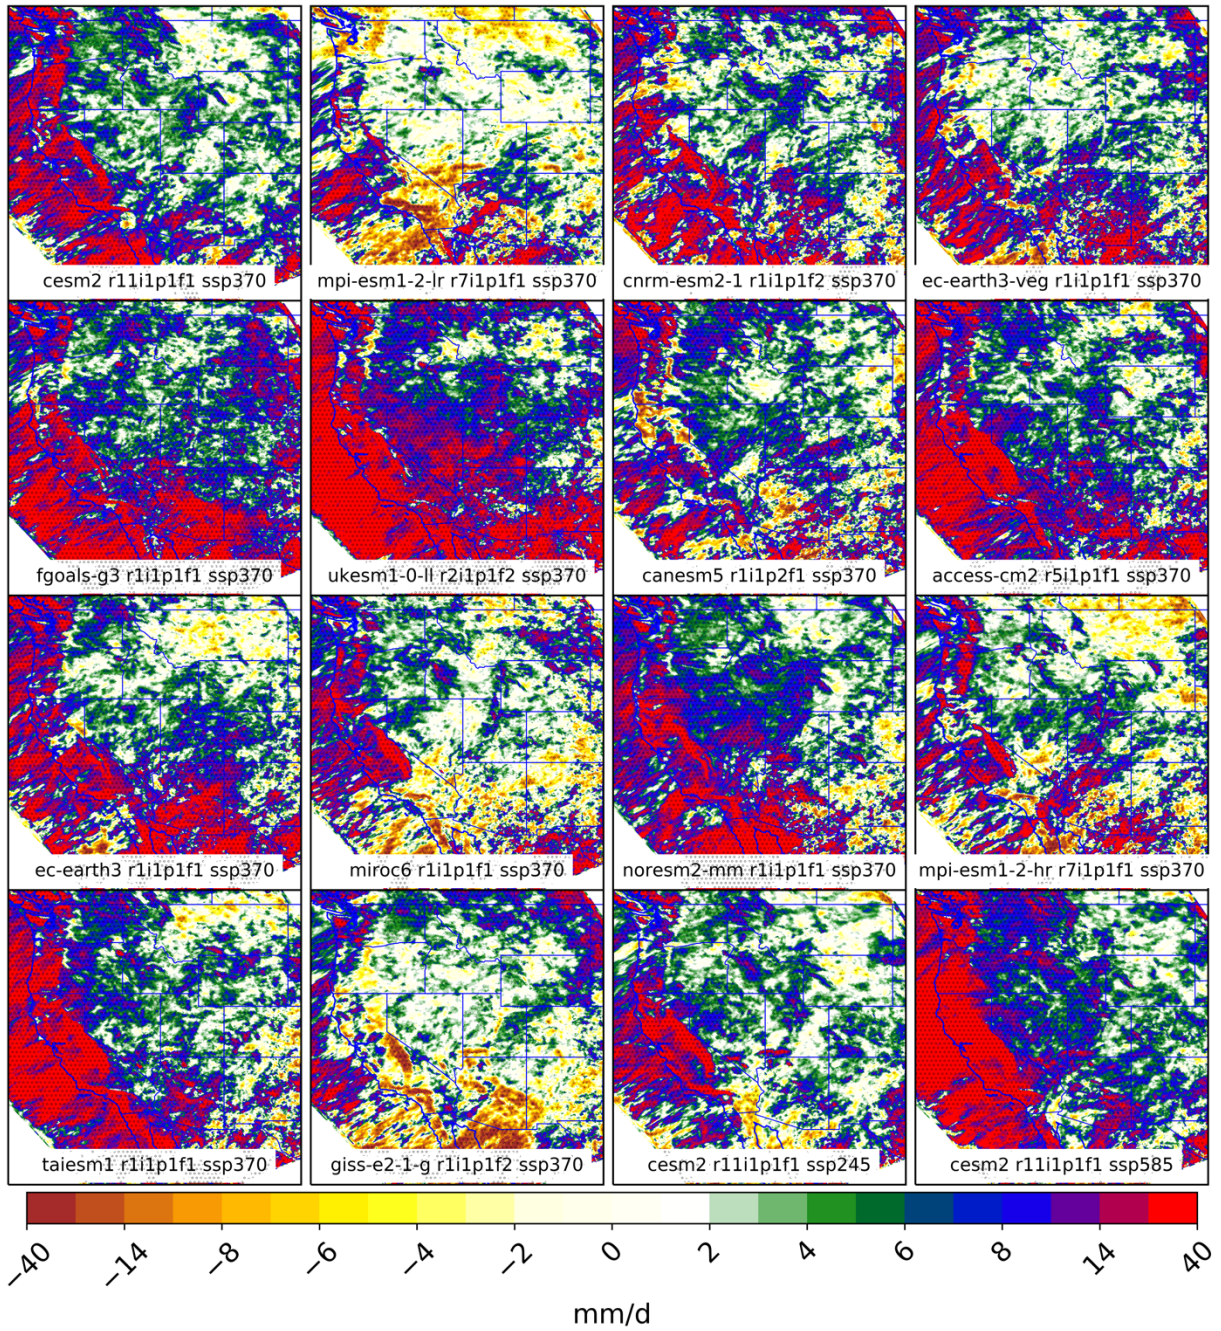

**Figure 10.** End-of-century (2070-2100) changes in rx1day precipitation for each GCM [mm d<sup>-1</sup>]. Circles denote statistical significance to the 95% for a two-sided Student's t-test.

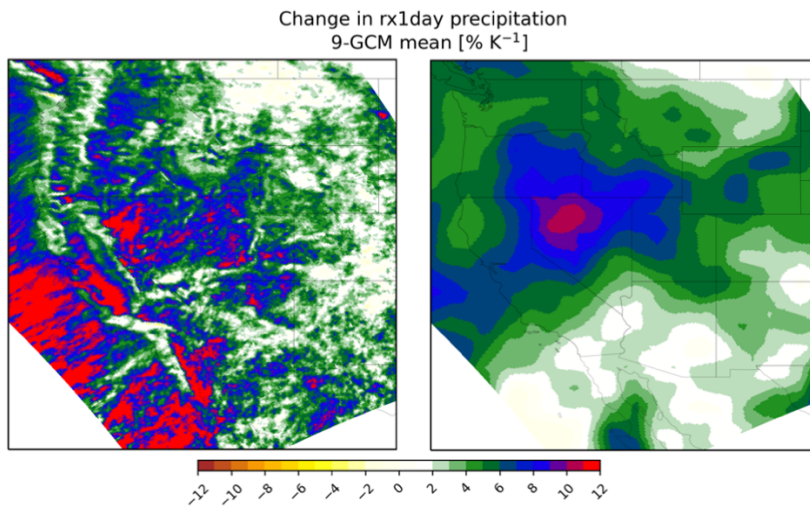

**Figure S11. Future change in (left) WRF and (right) GCM rx1day precipitation considering a 9-GCM mean [% K<sup>-1</sup>].**

# Future changes in Tmax99 [#days/year/K]

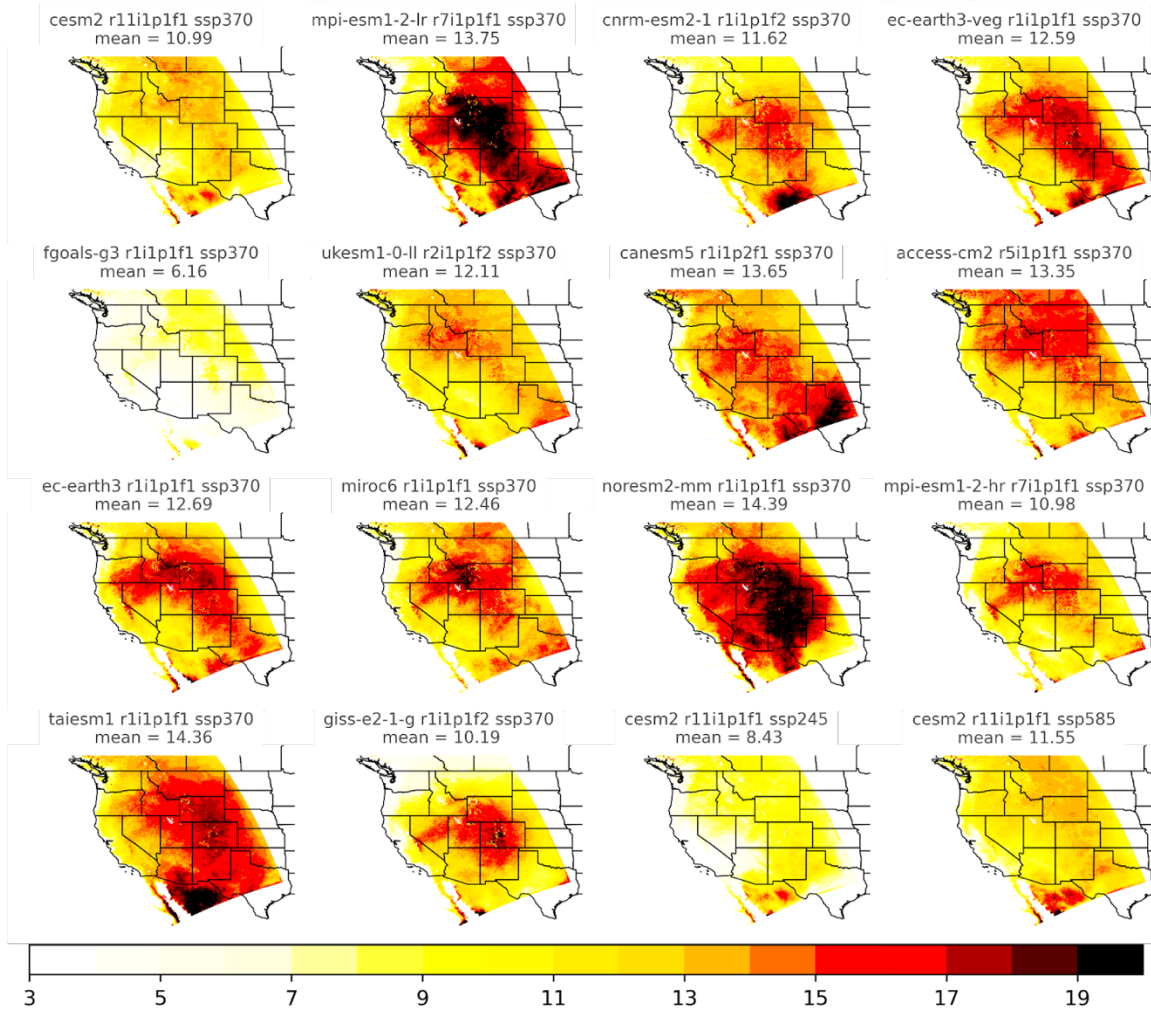

Figure S12. Future changes in maximum daily 99<sup>th</sup> percentile surface air temperature (Tmax99) per degree of global warming [days year<sup>-1</sup> K<sup>-1</sup>] for each downscaled GCM.

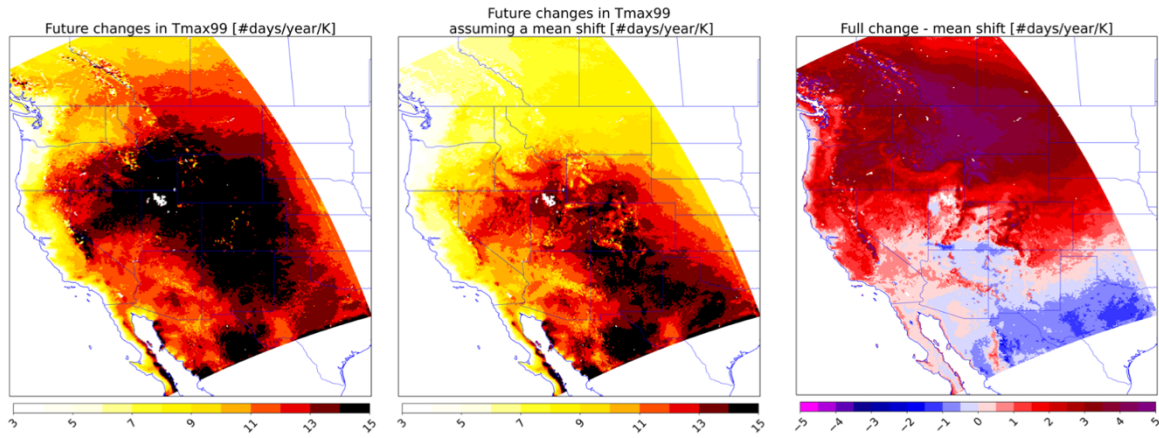

**Figure S13.** 11-GCM future changes in maximum daily 99<sup>th</sup> percentile surface air temperature (Tmax99) per degree of global warming [ $\text{days year}^{-1} \text{K}^{-1}$ ] considering the full change (left) and assuming a mean shift in the temperature distribution (middle). The right panel presents the difference between the left and center panels.
